# Supplementary material for: Semiconducting/insulating polymer blends with dual phase separation for organic field-effect transistors
Source: Royal Society of Chemistry journal article supplement (doi:10.1039/c6ra27953h), 2017-01-01
Supplement: c6ra27953h1.pdf [file c6ra27953h1.pdf]

# RSC Advances Supporting Information

## Semiconducting/Insulating Polymer Blends with Dual Phase Separation for Organic Field-Effect Transistors

Jung Hun Lee<sup>a</sup>, Young Hun Lee<sup>b</sup>, Yeon Hee Ha<sup>c</sup>, Jaehyuk Kwon<sup>d</sup>, Seungmoon Pyo<sup>d</sup>, Yun-Hi Kim<sup>c\*</sup>, Wi Hyoung Lee<sup>a\*</sup>

<sup>a</sup>Department of Organic and Nano System Engineering, Konkuk University, Seoul 143-701, Korea;

<sup>b</sup>School of Advanced Materials Science and Engineering, Sungkyunkwan University, Suwon, Korea; <sup>c</sup>Department of Chemistry and RINS, Gyeongsang National University, Jinju, 660-701, Korea; <sup>d</sup>Department of Chemistry, Konkuk University, 120 Neungdong-ro, Gwangjin-gu, Seoul 143-701, Korea

**Table S1.** Electrical properties of OFETs based on 24-DPP-TVT (29-DPP-TVT) films or 24-DPP-TVT (29-DPP-TVT)/PMMA blend films.

|              | $\mu^a$<br>[cm <sup>2</sup> V <sup>-1</sup> s <sup>-1</sup> ] | $\mu^b$<br>[cm <sup>2</sup> V <sup>-1</sup> s <sup>-1</sup> ] | $I_{ON}/I_{OFF}$ |
|--------------|---------------------------------------------------------------|---------------------------------------------------------------|------------------|
| DPP-C24      | 0.4 (±) 0.09                                                  | 0.013 (±) 0.001                                               | 10 <sup>7</sup>  |
| DPP-C24/PMMA | 0.012 (±) 0.003                                               | 0.0008 (±) 0.0001                                             | 10 <sup>6</sup>  |
| DPP-C29      | 0.83 (±) 0.15                                                 | 0.014 (±) 0.001                                               | 10 <sup>8</sup>  |
| DPP-C29/PMMA | 0.67 (±) 0.1                                                  | 0.011 (±) 0.001                                               | 10 <sup>8</sup>  |

<sup>a</sup>) Obtained at the low gate voltage near the turn-on region; <sup>b</sup>) Obtained at the high gate voltage in Figure 4(b).

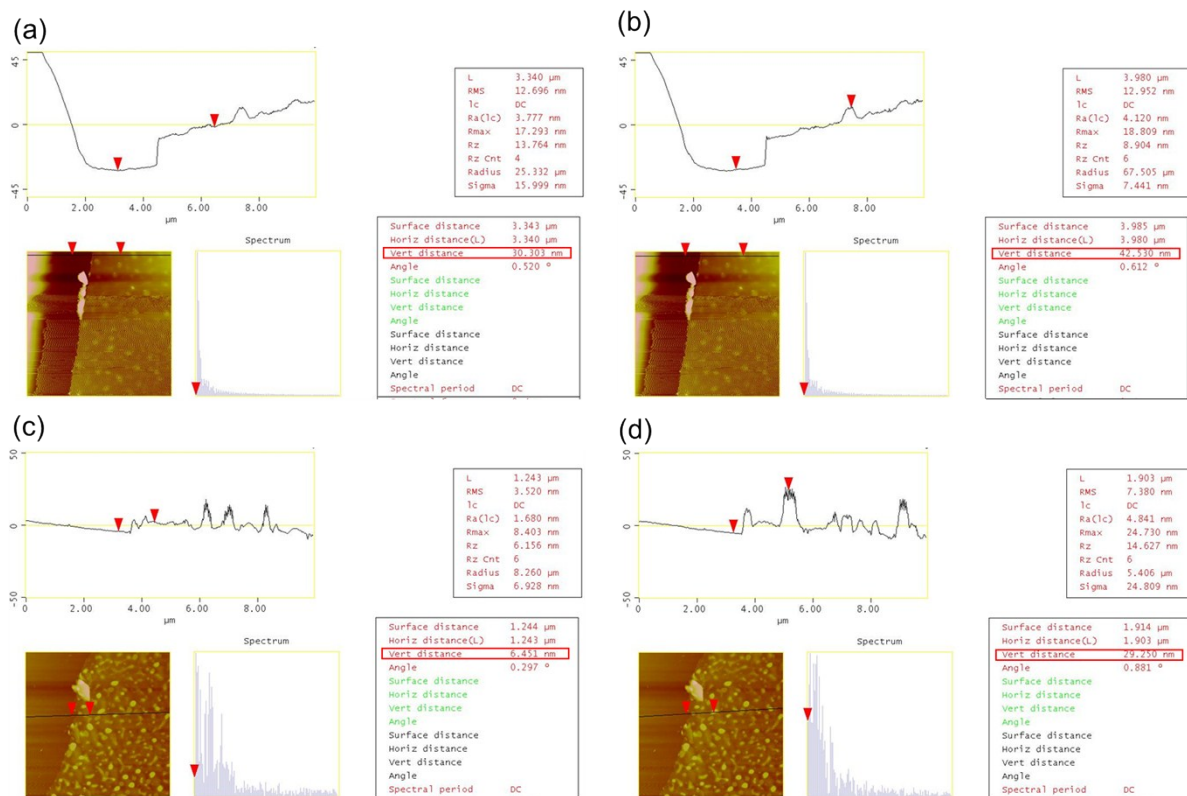

**Figure S1.** AFM surface profiles and height images of 24-DPP-TVT/PMMA blend films before (a, b) and after (c, d) etching PMMA layer with acetic acid. 24-DPP-TVT/PMMA blend films were scratched with a knife for measuring thickness.

(a)

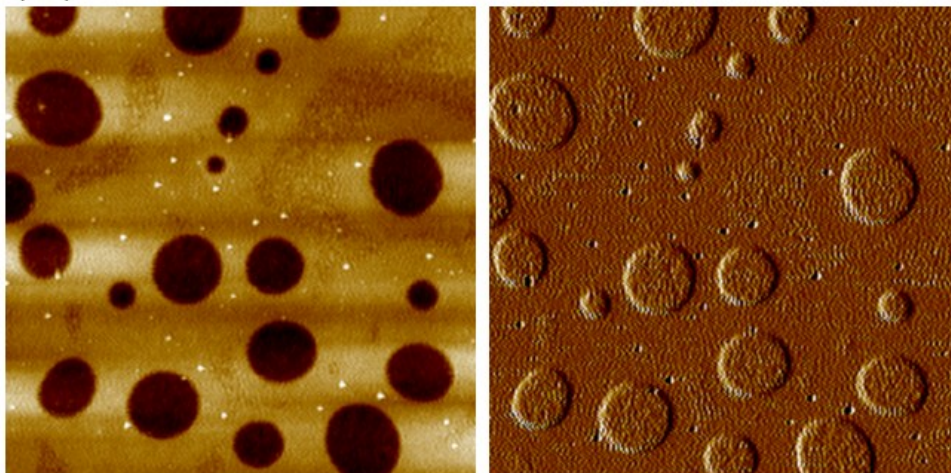

(b)

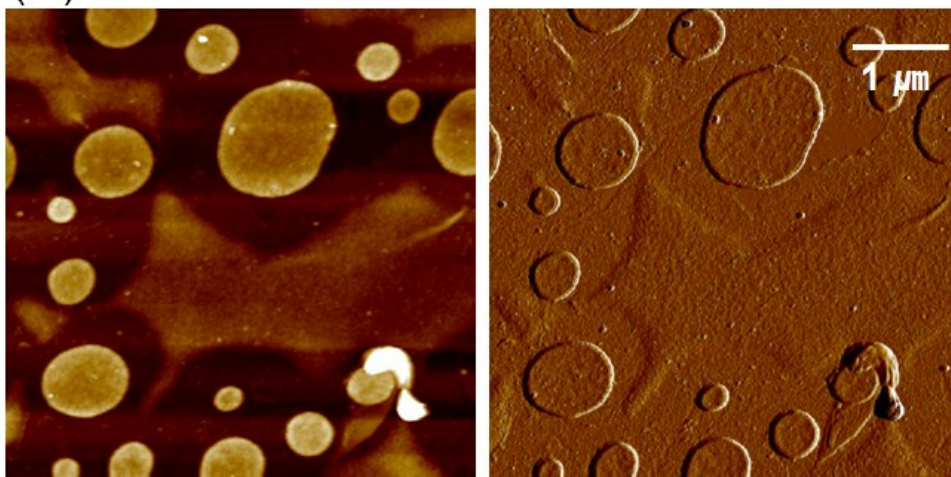

**Figure S2.** AFM height (left) and phase (right) images of P3HT:PMMA (1:3) blend film before (a) and after etching PMMA layer with acetic acid (b).

(a)

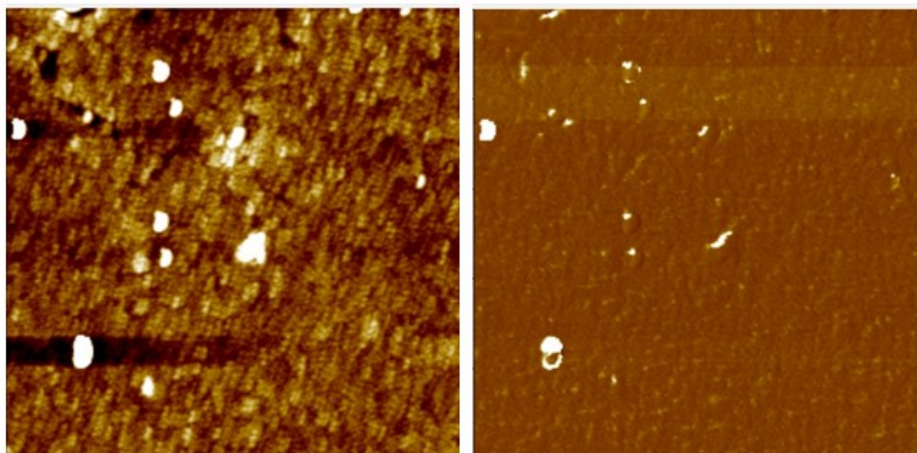

(b)

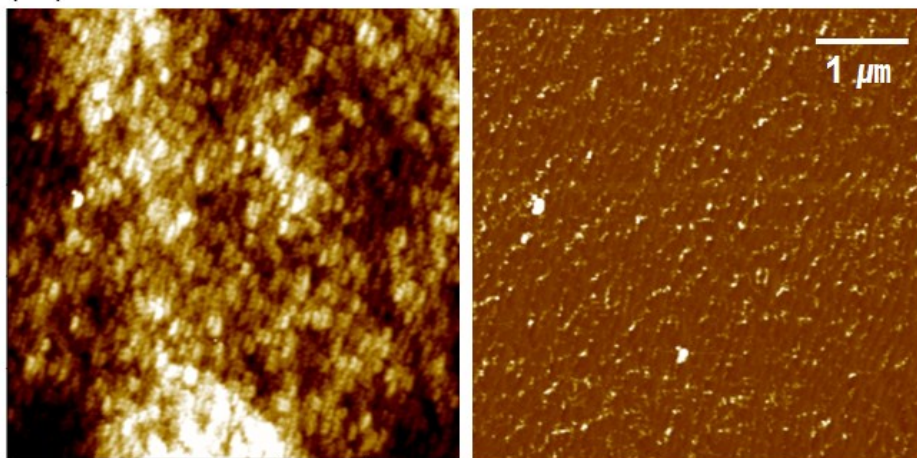

**Figure S3.** AFM height (left) and phase (right) images of 24-DPP-TVT film (a), and 29-DPP-TVT film (b).
